# Supplementary material
Source: publisher figshare collection journal article supplement (https://acs.figshare.com/ndownloader/files/24163506)
Supplement: Supplementary file 1 [file 24163506]

## Supporting Information For

### **Noncovalently Functionalized Sulfated Castor Oil – Graphene Oxide-Strengthened Polyetherimide Composite Membranes for Superior Separation of Organic Pollutants and Their Fouling Mitigation**

Palsamy Kanagaraj, Wei Huang, Changkun Liu\*

College of Chemistry and Environmental Engineering, Xili Campus, Shenzhen University, 1066 Xueyuan Boulevard, Nanshan District, Shenzhen 518071, People's Republic of China

Corresponding author: Email: [liuck@szu.edu.cn](mailto:liuck@szu.edu.cn) (*Dr. Changkun Liu\**), Tel: +86-755-26536157

Table S1. The specification details of the sulfated castor oil

| <b>Sulfated castor oil (SCO)</b> |                   |
|----------------------------------|-------------------|
| Reaction time                    | 3 hours           |
| Reaction temperature             | 25-32°C           |
| pH                               | 7.4               |
| Solubility                       | Miscible in water |
| Appearance                       | Brownish red      |
| Molecular weight                 | 1172 g/mol        |

Table S2. The casting solution compositions of different polymers and additives

| Membranes                       | Blend compositions (wt%) |     |     | Solvent (wt%)<br>NMP | PWF<br>Lm <sup>-2</sup> h <sup>-1</sup>      | Water contact angle (Top surface) (°) |
|---------------------------------|--------------------------|-----|-----|----------------------|----------------------------------------------|---------------------------------------|
|                                 | PEI                      | SCO | GO  |                      |                                              |                                       |
| PEI <sub>15</sub>               | 15                       | 0.0 | 0   | 85.0                 | 5.40                                         | 110.1                                 |
| PEI <sub>17.5</sub>             | 17.5                     | 0.0 | 0   | 82.5                 | 6.50                                         | 108.3                                 |
| <b>Bare PEI<sub>20</sub></b>    | 20                       | 0.0 | 0   | 80.0                 | <b>7.80</b>                                  | 98.5                                  |
| PEI/SCO <sub>0.5</sub>          | 20                       | 0.5 | 0   | 79.5                 | 15.4                                         | 90.5                                  |
| PEI/SCO <sub>1.0</sub>          | 20                       | 1.0 | 0   | 79.0                 | 20.1                                         | 90.0                                  |
| PEI/SCO <sub>1.5</sub>          | 20                       | 1.5 | 0   | 78.5                 | 24.3                                         | 89.2                                  |
| PEI/SCO <sub>2.0</sub>          | 20                       | 2.0 | 0   | 78.0                 | 32.5                                         | 88.1                                  |
| <b>PEI/SCO<sub>2.5</sub></b>    | 20                       | 2.5 | 0   | 77.5                 | <b>64.5</b>                                  | 83.5                                  |
| PEI/SCO <sub>3.0</sub>          | 20                       | 3.0 | 0   | 77.0                 | Film damage due to phase separation          |                                       |
| PEI/GO <sub>0.1</sub>           | 20                       | 0.0 | 0.1 | 79.9                 | 30.3                                         | 76.4                                  |
| PEI/GO <sub>0.2</sub>           | 20                       | 0.0 | 0.2 | 79.8                 | 70.4                                         | 60.6                                  |
| PEI/GO <sub>0.3</sub>           | 20                       | 0.0 | 0.3 | 79.7                 | 45.2 (Flux decline due to aggregation of GO) | 58.1                                  |
| PEI/SCO@GO <sub>0.1</sub>       | 20                       | 2.5 | 0.1 | 77.4                 | 150.6                                        | 68.2                                  |
| <b>PEI/SCO@GO<sub>0.2</sub></b> | 20                       | 2.5 | 0.2 | 77.3                 | <b>410.6</b>                                 | 40.4                                  |

|                           |    |     |     |      |                     |      |
|---------------------------|----|-----|-----|------|---------------------|------|
| PEI/SCO@GO <sub>0.3</sub> | 20 | 2.0 | 0.3 | 77.2 | 18.6 (Flux decline) | 42.1 |
|---------------------------|----|-----|-----|------|---------------------|------|

## S1. Membranes characterization

The presence of the sulfonated group in castor oil was analyzed by using Fourier transform infrared (FT-IR) spectrometer (Thermo Nicolet Nexus-410, USA). The presences of the functional moieties in the prepared PEI membranes were analyzed using the attenuated total reflectance FT-IR (ATR-FTIR, IR affinity-1, Shimadzu, Japan). The Raman spectroscopy was recorded using Raman Microscope (Renishaw InVia, UK) with Argon ion (green) laser beam of 514 nm wavelength. The X-ray diffraction (XRD) analysis of the bare PEI, PEI/SCO and PEI/SCO@GO membranes were measured using an X-ray diffractometer (XRD, Smart Lab, Rigaku, Japan) operating at the voltage of 40 mV and current of 40 mA with the reference target of Cu-K $\alpha$  radiation. The membrane XRD data were collected from  $2\theta = 5^\circ$  to  $50^\circ$  with the step of  $0.01^\circ$  in the continuous scan range mode. The sample thickness for the XRD analysis was 200  $\mu\text{m}$ .

The elemental compositions of the whole structural membranes were studied by CHNS elemental analyzer (Vario EL cube Elementar, Germany). The surface elemental compositions of the membranes were tested by X-ray photon spectroscopy (XPS) (ESCALAB 250 XI, Thermo Scientific, USA) with the monochromatic of Al K $\alpha$  X-ray (1486.6 eV) used as a radiation source. The cross-section membrane structure of the bare PEI, PEI/SCO and PEI/SCO@GO membranes were analyzed using the scanning electron microscope (SEM, Hitachi, S-3400N, Japan). The samples were gold-sputtered prior to the SEM measurement. The roughness of the bare PEI, PEI/SCO and PEI/SCO@GO membranes were measured using the atomic force microscope

(AFM, Model-multimode 8, Bruker, Germany) and the data were recorded from the different locations of the tested sample.

The membrane hydrophilicity was measured using the water contact angle (CA) measuring system (SDC-70, Shengding, China) at the room temperature. The CA was analyzed at different locations of the membrane surfaces and their average values were reported. The surface charge of the bare PEI, PEI/SCO and PEI/SCO@GO membranes were analyzed via the surface zeta potential measurement (Anton Paar SurPASS 3, GmbH, Austria). The zeta potential values were carried out at a neutral pH of 7.0 at 25°C. The pH was adjusted using sodium hydroxide (NaOH) or hydrochloric acid (HCl) and the 10 mM potassium chloride (KCl) was used as a background electrolyte solution. The experiment was repeated for three times for each sample and their average values were reported.

The tensile strength of the bare PEI, PEI/SCO and PEI/SCO@GO membranes were measured using a tensile testing machine (CMT 4204, SANS, China). The sample with a uniform thickness of 0.2 mm, a length of 35 mm and a breadth of 16 mm was positioned between the grips of the tensile machine and the speed of testing was set at a rate of 2 mm min<sup>-1</sup> according to the ASTM-D882 measurements. The testing was performed for three times for each sample and their average values were reported.

Table S3. The permeate and recovery fluxes of the membranes

| Membranes  | Permeate fluxes<br>(Lm <sup>-2</sup> h <sup>-1</sup> ) |             |             | Recovery water fluxes after washing<br>with deionized water for 30 mins<br>(Lm <sup>-2</sup> h <sup>-1</sup> ) |             |             |
|------------|--------------------------------------------------------|-------------|-------------|----------------------------------------------------------------------------------------------------------------|-------------|-------------|
|            | Oil                                                    | HA          | BSA         | Oil                                                                                                            | HA          | BSA         |
| Bare PEI   | 1.0 ± 1.5                                              | 0.8 ± 0.8   | 1.0 ± 1.5   | 2.0 ± 0.4                                                                                                      | 2.4 ± 0.3   | 3.0 ± 1.6   |
| PEI/SCO    | 43.5 ± 0.7                                             | 38.6 ± 0.4  | 40.8 ± 0.8  | 48.6 ± 0.9                                                                                                     | 46.6 ± 0.6  | 53.1 ± 1.7  |
| PEI/SCO@GO | 371.0 ± 0.3                                            | 396.4 ± 1.9 | 348.2 ± 0.2 | 384.3 ± 0.5                                                                                                    | 405.4 ± 0.4 | 376.3 ± 2.0 |
